# Supplementary material for: TRIM25 and ZAP target the Ebola virus ribonucleoprotein complex to mediate interferon-induced restriction
Source: PubMed Central journal article supplement (PMC9119685; doi:10.1371/journal.ppat.1010530), 2022-05-09
Supplement: ppat.1010530.s005.pdf [file ppat.1010530.s005.pdf]

Supplemental Table 1

Large Scale ISG Screen: EboV trVLP in HEK293T cells – p1 and p2 values (Page 1 of 4)

| Gene         | P2                         |            | P1                         |            | Gene      | P2                         |            | P1                         |            |
|--------------|----------------------------|------------|----------------------------|------------|-----------|----------------------------|------------|----------------------------|------------|
|              | Replication<br>(% control) | Z<br>score | Replication<br>(% control) | Z<br>score |           | Replication<br>(% control) | Z<br>score | Replication<br>(% control) | Z<br>score |
| P2RY6        | 0.4                        | -1.24      | 41.5                       | -1.23      | MCOLN     | 28.0                       | -0.89      | 40.4                       | -1.25      |
| BST2/THN     | 0.5                        | -1.24      | 91.8                       | -0.18      | ZNF313    | 28.1                       | -0.89      | 53.5                       | -0.98      |
| CCL5         | 0.5                        | -1.24      | 106.0                      | 0.11       | PDGFRL    | 28.3                       | -0.89      | 100.0                      | -0.01      |
| NMI          | 0.6                        | -1.24      | 0.4                        | -2.08      | PNPT1     | 28.7                       | -0.88      | 103.6                      | 0.06       |
| APOL6        | 0.6                        | -1.24      | 188.5                      | 1.83       | PHF15     | 28.7                       | -0.88      | 119.2                      | 0.39       |
| ARHGAP17     | 1.9                        | -1.22      | 57.9                       | -0.88      | GBP5      | 28.9                       | -0.88      | 116.9                      | 0.34       |
| WHDC1        | 2.3                        | -1.21      | 32.0                       | -1.42      | JAK2      | 29.6                       | -0.87      | 96.8                       | -0.08      |
| B2M          | 2.8                        | -1.21      | 108.2                      | 0.16       | ATF3      | 30.3                       | -0.86      | 116.4                      | 0.33       |
| OAS1         | 2.9                        | -1.21      | 76.4                       | -0.50      | C10orf10  | 30.5                       | -0.86      | 41.8                       | -1.22      |
| CTCFL        | 3.3                        | -1.20      | 55.6                       | -0.93      | AIM2      | 30.5                       | -0.86      | 70.3                       | -0.63      |
| DNAPT6       | 3.4                        | -1.20      | 58.4                       | -0.88      | CCL19     | 30.6                       | -0.86      | 78.0                       | -0.47      |
| PPM1K        | 4.2                        | -1.19      | 35.0                       | -1.36      | RAB27A    | 30.9                       | -0.86      | 58.7                       | -0.87      |
| MT1G         | 4.3                        | -1.19      | 57.1                       | -0.90      | IFI35     | 31.1                       | -0.85      | 174.6                      | 1.54       |
| IFIH1 / MDA5 | 4.3                        | -1.19      | 17.9                       | -1.72      | FBXO6     | 31.4                       | -0.85      | 52.3                       | -1.00      |
| FNDC4        | 8.1                        | -1.14      | 142.9                      | 0.88       | UNC93B1   | 31.9                       | -0.84      | 28.2                       | -1.50      |
| C5orf39      | 8.3                        | -1.14      | 15.0                       | -1.78      | HLA-E     | 32.1                       | -0.84      | 66.7                       | -0.70      |
| SOCS2        | 8.5                        | -1.14      | 77.3                       | -0.48      | GTPBP2    | 32.5                       | -0.84      | 184.2                      | 1.74       |
| FCGR1A       | 10.1                       | -1.12      | 148.1                      | 0.99       | GLRX      | 32.8                       | -0.83      | 60.9                       | -0.82      |
| MCL1         | 11.2                       | -1.10      | 124.4                      | 0.50       | CX3CL1    | 33.1                       | -0.83      | 212.9                      | 2.33       |
| ARHGEF3      | 11.4                       | -1.10      | 15.9                       | -1.76      | TAP2      | 33.2                       | -0.83      | 145.1                      | 0.92       |
| FLT1         | 11.7                       | -1.10      | 67.9                       | -0.68      | XAF1      | 33.4                       | -0.82      | 55.0                       | -0.95      |
| MAP3K14      | 11.9                       | -1.09      | 63.6                       | -0.77      | WARS      | 33.7                       | -0.82      | 112.2                      | 0.24       |
| OASL         | 12.1                       | -1.09      | 123.2                      | 0.47       | IFNGR1    | 34.1                       | -0.82      | 51.7                       | -1.01      |
| TNK2         | 12.4                       | -1.09      | 165.0                      | 1.34       | SLC25A28  | 34.5                       | -0.81      | 105.1                      | 0.10       |
| GBP2         | 13.2                       | -1.08      | 74.2                       | -0.55      | VIPERIN   | 34.7                       | -0.81      | 98.2                       | -0.05      |
| GALNT2       | 13.7                       | -1.07      | 133.9                      | 0.69       | ZBP1      | 34.9                       | -0.81      | 54.1                       | -0.96      |
| FFAR2        | 14.9                       | -1.06      | 43.0                       | -1.20      | MYD88     | 35.4                       | -0.80      | 46.4                       | -1.12      |
| CCDC92       | 15.0                       | -1.06      | 79.8                       | -0.43      | CASP7     | 35.5                       | -0.80      | 71.3                       | -0.61      |
| LMO2         | 15.4                       | -1.05      | 80.7                       | -0.41      | NDC80     | 35.6                       | -0.80      | 66.9                       | -0.70      |
| SLC15A3      | 16.0                       | -1.04      | 174.0                      | 1.53       | MAFF      | 36.0                       | -0.79      | 97.5                       | -0.06      |
| HERC5        | 16.6                       | -1.04      | 77.1                       | -0.49      | APOBEC3A  | 36.5                       | -0.79      | 56.2                       | -0.92      |
| TXNIP        | 16.6                       | -1.03      | 80.5                       | -0.42      | ZNF385B   | 36.6                       | -0.78      | 61.2                       | -0.82      |
| UBA7         | 17.5                       | -1.02      | 55.8                       | -0.93      | DEFB1     | 37.1                       | -0.78      | 80.9                       | -0.41      |
| PIM3         | 17.5                       | -1.02      | 87.6                       | -0.27      | XRN       | 37.1                       | -0.78      | 88.0                       | -0.26      |
| TRIM25       | 17.7                       | -1.02      | 25.4                       | -1.56      | SAMD4A    | 38.3                       | -0.76      | 62.5                       | -0.79      |
| TRIM56       | 19.2                       | -1.00      | 25.6                       | -1.56      | SMAD3     | 38.7                       | -0.76      | 80.5                       | -0.42      |
| SLFN12       | 19.4                       | -1.00      | 56.1                       | -0.92      | STAT2     | 39.9                       | -0.74      | 105.0                      | 0.09       |
| STEAP4       | 19.8                       | -1.00      | 86.3                       | -0.30      | PUS1      | 39.9                       | -0.74      | 120.3                      | 0.41       |
| CXCL10       | 19.8                       | -0.99      | 90.5                       | -0.21      | IFIT3     | 40.9                       | -0.73      | 92.5                       | -0.17      |
| MAB21L2      | 19.9                       | -0.99      | 130.6                      | 0.62       | C15orf48  | 41.2                       | -0.73      | 63.9                       | -0.76      |
| FAM46C       | 20.6                       | -0.99      | 38.6                       | -1.29      | IFITM1    | 41.3                       | -0.73      | 109.3                      | 0.18       |
| MX2          | 21.6                       | -0.97      | 49.9                       | -1.05      | GK        | 41.4                       | -0.72      | 67.8                       | -0.68      |
| GBP1         | 21.8                       | -0.97      | 78.6                       | -0.46      | SAT1      | 42.4                       | -0.71      | 93.9                       | -0.14      |
| PABPC4       | 22.0                       | -0.97      | 20.4                       | -1.67      | KIAA0082  | 42.5                       | -0.71      | 50.9                       | -1.03      |
| SERPINE1     | 22.3                       | -0.96      | 52.2                       | -1.00      | TNFRSF10A | 43.7                       | -0.70      | 177.3                      | 1.59       |
| SERPING1     | 23.2                       | -0.95      | 68.0                       | -0.68      | TNFAIP3   | 44.3                       | -0.69      | 182.0                      | 1.69       |
| C5orf27      | 23.5                       | -0.95      | 81.9                       | -0.39      | IL28RA    | 44.4                       | -0.69      | 80.4                       | -0.42      |
| SERPINB9     | 23.8                       | -0.94      | 155.3                      | 1.14       | NFIL3     | 45.0                       | -0.68      | 78.1                       | -0.47      |
| IRF1         | 24.0                       | -0.94      | 33.2                       | -1.40      | RARRES3   | 45.1                       | -0.68      | 97.0                       | -0.07      |
| HCP5         | 24.5                       | -0.94      | 110.4                      | 0.21       | BIRC3     | 46.4                       | -0.66      | 67.0                       | -0.70      |
| ODC1         | 24.6                       | -0.93      | 151.4                      | 1.06       | HEG1      | 46.5                       | -0.66      | 74.1                       | -0.55      |
| TRIM14       | 24.7                       | -0.93      | 65.9                       | -0.72      | C9orf19   | 46.5                       | -0.66      | 85.1                       | -0.32      |
| CLEC4D       | 25.3                       | -0.93      | 68.9                       | -0.66      | HSPA6     | 46.6                       | -0.66      | 124.7                      | 0.50       |
| IFIT1        | 25.4                       | -0.92      | 96.3                       | -0.09      | USP18     | 47.4                       | -0.65      | 52.6                       | -1.00      |
| CNP          | 25.5                       | -0.92      | 156.1                      | 1.15       | DDX60     | 47.7                       | -0.65      | 87.9                       | -0.26      |
| NCF1         | 26.8                       | -0.91      | 92.8                       | -0.16      | EPAS1     | 48.0                       | -0.64      | 193.5                      | 1.93       |
| CD274        | 26.9                       | -0.91      | 88.2                       | -0.26      | SAMHD1    | 48.2                       | -0.64      | 55.7                       | -0.93      |
| IFI27        | 27.5                       | -0.90      | 95.5                       | -0.10      | FAM125B   | 48.4                       | -0.64      | 60.8                       | -0.82      |
| CEACAM1      | 27.6                       | -0.90      | 59.7                       | -0.85      | STAP1     | 49.1                       | -0.63      | 50.5                       | -1.04      |

Large Scale ISG Screen: EboV trVLP in HEK293T cells – p1 and p2 values (Page 2 of 4)

| Gene     | P2                      |         | P1                      |         | Gene    | P2                      |         | P1                      |         |
|----------|-------------------------|---------|-------------------------|---------|---------|-------------------------|---------|-------------------------|---------|
|          | Replication (% control) | Z score | Replication (% control) | Z score |         | Replication (% control) | Z score | Replication (% control) | Z score |
| DYNLT1   | 49.5                    | -0.62   | 77.0                    | -0.49   | ISG20   | 68.1                    | -0.39   | 44.7                    | -1.16   |
| SSBP3    | 49.5                    | -0.62   | 51.2                    | -1.03   | TRAFD1  | 68.1                    | -0.39   | 126.7                   | 0.54    |
| RBM43    | 49.7                    | -0.62   | 75.9                    | -0.51   | MX1     | 68.2                    | -0.39   | 72.0                    | -0.59   |
| AKT3     | 49.8                    | -0.62   | 109.0                   | 0.18    | HLA-F   | 68.4                    | -0.39   | 125.4                   | 0.52    |
| ANGPTL1  | 50.5                    | -0.61   | 97.3                    | -0.07   | TAP1    | 68.6                    | -0.38   | 98.8                    | -0.04   |
| FAM70A   | 50.7                    | -0.61   | 75.8                    | -0.51   | LGALS3  | 69.9                    | -0.37   | 85.9                    | -0.30   |
| UPP2     | 50.7                    | -0.61   | 50.0                    | -1.05   | HLA-C   | 70.2                    | -0.36   | 123.5                   | 0.48    |
| SIRPA    | 51.0                    | -0.60   | 38.2                    | -1.29   | CASP1   | 70.4                    | -0.36   | 43.4                    | -1.19   |
| CCND3    | 52.1                    | -0.59   | 163.9                   | 1.32    | RPL22   | 70.8                    | -0.35   | 116.2                   | 0.33    |
| RNF19B   | 52.2                    | -0.59   | 82.5                    | -0.37   | APOL3   | 71.2                    | -0.35   | 75.3                    | -0.52   |
| MTHFD2L  | 52.5                    | -0.59   | 73.4                    | -0.56   | PSCD1   | 72.4                    | -0.34   | 67.5                    | -0.69   |
| EIF3EIP  | 53.2                    | -0.58   | 147.1                   | 0.97    | SCO2    | 72.6                    | -0.33   | 166.5                   | 1.37    |
| THBD     | 53.3                    | -0.57   | 201.1                   | 2.09    | TRIM38  | 73.4                    | -0.32   | 116.5                   | 0.33    |
| NT5C3    | 53.5                    | -0.57   | 84.5                    | -0.33   | IFI44   | 75.2                    | -0.30   | 79.5                    | -0.44   |
| PSMB8    | 53.6                    | -0.57   | 80.4                    | -0.42   | IFI44L  | 75.7                    | -0.29   | 30.0                    | -1.47   |
| MS4A4A   | 54.0                    | -0.57   | 52.2                    | -1.00   | AXUD1   | 75.9                    | -0.29   | 90.9                    | -0.20   |
| SECTM1   | 54.0                    | -0.57   | 45.8                    | -1.14   | MAFF    | 76.4                    | -0.28   | 102.4                   | 0.04    |
| ABLIM3   | 54.5                    | -0.56   | 53.7                    | -0.97   | ARNTL   | 76.6                    | -0.28   | 154.5                   | 1.12    |
| FAM46A   | 54.9                    | -0.55   | 52.3                    | -1.00   | TLR3    | 76.9                    | -0.28   | 106.4                   | 0.12    |
| RTP4     | 55.1                    | -0.55   | 87.1                    | -0.28   | CXCL9   | 77.0                    | -0.28   | 85.2                    | -0.32   |
| CMAH     | 55.2                    | -0.55   | 115.0                   | 0.30    | C9orf91 | 77.0                    | -0.28   | 120.6                   | 0.42    |
| MT1M     | 55.9                    | -0.54   | 148.2                   | 0.99    | IFI16   | 77.7                    | -0.27   | 94.9                    | -0.12   |
| SOCS1    | 56.6                    | -0.53   | 108.5                   | 0.17    | PSMB9   | 77.7                    | -0.27   | 126.0                   | 0.53    |
| DDX58    | 57.1                    | -0.53   | 33.2                    | -1.40   | IFITM3  | 78.3                    | -0.26   | 64.8                    | -0.74   |
| BAG1     | 57.2                    | -0.53   | 122.4                   | 0.45    | ALDH1A1 | 78.9                    | -0.25   | 69.4                    | -0.65   |
| UNC84B   | 57.3                    | -0.52   | 96.8                    | -0.08   | ERLIN1  | 79.2                    | -0.25   | 72.9                    | -0.57   |
| C19orf66 | 57.4                    | -0.52   | 96.9                    | -0.08   | CCL8    | 79.3                    | -0.25   | 51.3                    | -1.02   |
| B4GALT5  | 57.9                    | -0.52   | 104.5                   | 0.08    | INDO    | 79.8                    | -0.24   | 88.7                    | -0.25   |
| SPTLC2   | 58.1                    | -0.51   | 88.3                    | -0.25   | RNASE4  | 80.1                    | -0.24   | 161.0                   | 1.26    |
| BUB1     | 58.6                    | -0.51   | 74.2                    | -0.55   | AGPAT9  | 80.2                    | -0.24   | 69.0                    | -0.66   |
| MOV10    | 59.1                    | -0.50   | 513.4                   | 8.58    | DCP1A   | 82.3                    | -0.21   | 108.3                   | 0.16    |
| SAMD9L   | 59.4                    | -0.50   | 66.9                    | -0.70   | HERC6   | 82.5                    | -0.21   | 124.0                   | 0.49    |
| TMEM51   | 60.0                    | -0.49   | 104.9                   | 0.09    | IL17RB  | 82.9                    | -0.20   | 152.4                   | 1.08    |
| VAMP5    | 60.2                    | -0.49   | 65.5                    | -0.73   | JUNB    | 84.0                    | -0.19   | 115.9                   | 0.32    |
| BLZF1    | 60.2                    | -0.49   | 109.1                   | 0.18    | N4BP1   | 84.5                    | -0.18   | 59.3                    | -0.86   |
| PRKD2    | 60.4                    | -0.49   | 150.6                   | 1.04    | EPSTI1  | 84.6                    | -0.18   | 90.3                    | -0.21   |
| CHMP5    | 60.6                    | -0.48   | 126.8                   | 0.55    | TGFB1   | 85.1                    | -0.18   | 126.1                   | 0.53    |
| DDX3X    | 60.6                    | -0.48   | 59.7                    | -0.85   | SAA1    | 85.1                    | -0.18   | 204.6                   | 2.16    |
| TMEM49   | 60.9                    | -0.48   | 118.1                   | 0.36    | PFKFB3  | 85.6                    | -0.17   | 137.3                   | 0.76    |
| SP110    | 61.2                    | -0.48   | 131.9                   | 0.65    | C2orf31 | 85.9                    | -0.17   | 125.1                   | 0.51    |
| CCNA1    | 62.6                    | -0.46   | 128.5                   | 0.58    | PCTK3   | 86.5                    | -0.16   | 113.5                   | 0.27    |
| IRF9     | 62.9                    | -0.46   | 90.5                    | -0.21   | PARP12  | 86.7                    | -0.16   | 103.0                   | 0.05    |
| PARP10   | 63.6                    | -0.45   | 98.6                    | -0.04   | STARD5  | 87.4                    | -0.15   | 115.0                   | 0.30    |
| SLC1A1   | 63.7                    | -0.45   | 51.9                    | -1.01   | FER1L3  | 87.5                    | -0.15   | 69.5                    | -0.65   |
| ANKRD22  | 64.0                    | -0.44   | 110.6                   | 0.21    | ISG15   | 87.6                    | -0.14   | 135.4                   | 0.72    |
| C4orf32  | 64.0                    | -0.44   | 91.9                    | -0.18   | MT1L    | 87.7                    | -0.14   | 84.7                    | -0.33   |
| BCL3     | 64.0                    | -0.44   | 128.9                   | 0.59    | IFI6    | 87.9                    | -0.14   | 47.4                    | -1.10   |
| MAFF     | 64.1                    | -0.44   | 64.8                    | -0.74   | IFITM2  | 88.1                    | -0.14   | 86.1                    | -0.30   |
| C4orf33  | 64.4                    | -0.44   | 76.6                    | -0.50   | PMAIP1  | 88.5                    | -0.13   | 61.8                    | -0.81   |
| C1S      | 64.5                    | -0.43   | 50.3                    | -1.04   | NOS2A   | 89.7                    | -0.12   | 76.5                    | -0.50   |
| APOL2    | 64.6                    | -0.43   | 87.8                    | -0.26   | PLEKHA4 | 90.0                    | -0.11   | 83.1                    | -0.36   |
| TRIM21   | 65.5                    | -0.42   | 56.4                    | -0.92   | STAT3   | 90.7                    | -0.11   | 61.9                    | -0.80   |
| HESX1    | 65.9                    | -0.42   | 97.7                    | -0.06   | EIF2AK2 | 91.0                    | -0.10   | 67.4                    | -0.69   |
| SNN      | 66.7                    | -0.41   | 57.6                    | -0.89   | ELF1    | 91.5                    | -0.10   | 32.8                    | -1.41   |
| LIPA     | 66.7                    | -0.41   | 107.0                   | 0.13    | PBEF1   | 92.3                    | -0.09   | 127.7                   | 0.56    |
| LAMP3    | 67.1                    | -0.40   | 107.0                   | 0.13    | RIPK2   | 92.6                    | -0.08   | 28.7                    | -1.49   |
| CCDC109B | 67.2                    | -0.40   | 51.7                    | -1.02   | DUSP5   | 93.1                    | -0.08   | 142.8                   | 0.88    |
| OPTN     | 67.8                    | -0.39   | 77.9                    | -0.47   | CSDA    | 93.8                    | -0.07   | 164.4                   | 1.33    |
| DDIT4    | 68.0                    | -0.39   | 130.1                   | 0.61    | OGFR    | 94.1                    | -0.06   | 106.3                   | 0.12    |

Large Scale ISG Screen: EboV trVLP in HEK293 cells – p1 and p2 values (Page 3 of 4)

| Gene     | P2                      |         | P1                      |         | Gene     | P2                      |         | P1                      |         |
|----------|-------------------------|---------|-------------------------|---------|----------|-------------------------|---------|-------------------------|---------|
|          | Replication (% control) | Z score | Replication (% control) | Z score |          | Replication (% control) | Z score | Replication (% control) | Z score |
| EXT1     | 94.2                    | -0.06   | 99.2                    | -0.03   | SLC25A30 | 128.3                   | 0.37    | 157.1                   | 1.18    |
| RBM25    | 95.1                    | -0.05   | 77.9                    | -0.47   | S100A8   | 128.4                   | 0.37    | 96.7                    | -0.08   |
| BCL2L14  | 95.1                    | -0.05   | 60.0                    | -0.84   | SP100    | 129.2                   | 0.38    | 82.8                    | -0.37   |
| PRAME    | 95.9                    | -0.04   | 177.4                   | 1.60    | CRY1     | 130.9                   | 0.40    | 115.4                   | 0.31    |
| GEM      | 95.9                    | -0.04   | 80.8                    | -0.41   | ATP10D   | 131.8                   | 0.41    | 102.7                   | 0.04    |
| BTN3A3   | 96.1                    | -0.04   | 106.2                   | 0.12    | IL1RN    | 132.0                   | 0.41    | 175.7                   | 1.56    |
| TBX3     | 96.4                    | -0.03   | 168.5                   | 1.41    | IFI30    | 132.5                   | 0.42    | 107.7                   | 0.15    |
| MICB     | 98.2                    | -0.01   | 63.5                    | -0.77   | APOBEC3G | 132.8                   | 0.42    | 68.1                    | -0.67   |
| GPX2     | 98.9                    | 0.00    | 114.8                   | 0.30    | TDRD7    | 132.9                   | 0.42    | 123.3                   | 0.47    |
| CD74     | 100.2                   | 0.01    | 130.0                   | 0.61    | PTMA     | 133.0                   | 0.42    | 99.1                    | -0.03   |
| STAT1    | 101.6                   | 0.03    | 115.6                   | 0.31    | LINCRC   | 134.5                   | 0.44    | 83.8                    | -0.35   |
| RNF24    | 102.2                   | 0.04    | 91.1                    | -0.20   | MT1F     | 134.6                   | 0.44    | 49.9                    | -1.05   |
| GZMB     | 102.2                   | 0.04    | 75.8                    | -0.51   | GCA      | 134.7                   | 0.45    | 98.5                    | -0.04   |
| CYP1B1   | 102.4                   | 0.04    | 202.7                   | 2.12    | CD163    | 136.0                   | 0.46    | 174.2                   | 1.53    |
| LEPR     | 102.4                   | 0.04    | 116.0                   | 0.32    | CPT1A    | 136.6                   | 0.47    | 161.5                   | 1.27    |
| ADAMDEC1 | 103.3                   | 0.05    | 101.6                   | 0.02    | TCF7L2   | 136.7                   | 0.47    | 138.7                   | 0.79    |
| NPAS2    | 103.6                   | 0.06    | 133.9                   | 0.69    | SLC16A1  | 137.5                   | 0.48    | 46.8                    | -1.12   |
| ADFP     | 104.0                   | 0.06    | 103.1                   | 0.05    | PMM2     | 139.5                   | 0.51    | 103.8                   | 0.07    |
| ANKFY1   | 104.0                   | 0.06    | 92.6                    | -0.17   | MAFB     | 139.6                   | 0.51    | 214.0                   | 2.36    |
| ABTB2    | 104.7                   | 0.07    | 144.1                   | 0.90    | THOC4    | 140.0                   | 0.51    | 105.6                   | 0.10    |
| CD69     | 105.2                   | 0.08    | 108.9                   | 0.17    | HES4     | 140.8                   | 0.52    | 149.2                   | 1.01    |
| ZNF295   | 106.3                   | 0.09    | 115.1                   | 0.30    | TIMP1    | 143.6                   | 0.56    | 76.6                    | -0.50   |
| AQP9     | 106.6                   | 0.09    | 51.1                    | -1.03   | IRF7     | 143.7                   | 0.56    | 186.1                   | 1.78    |
| NCOA3    | 107.0                   | 0.10    | 104.8                   | 0.09    | TAGAP    | 143.7                   | 0.56    | 153.9                   | 1.11    |
| CCDC75   | 107.9                   | 0.11    | 88.5                    | -0.25   | LGMN     | 145.4                   | 0.58    | 113.9                   | 0.28    |
| RGS1     | 108.4                   | 0.12    | 183.2                   | 1.72    | PADI2    | 146.2                   | 0.59    | 278.6                   | 3.70    |
| FKBP5    | 108.8                   | 0.12    | 78.9                    | -0.45   | BLVRA    | 146.5                   | 0.59    | 86.8                    | -0.29   |
| FLJ39739 | 108.8                   | 0.12    | 104.5                   | 0.08    | SQLE     | 146.9                   | 0.60    | 118.5                   | 0.37    |
| CXCL11   | 109.6                   | 0.13    | 85.0                    | -0.32   | NOD2     | 147.4                   | 0.61    | 169.5                   | 1.43    |
| CLEC2B   | 109.7                   | 0.13    | 142.8                   | 0.88    | GBP3     | 148.4                   | 0.62    | 145.5                   | 0.93    |
| PXK      | 110.1                   | 0.14    | 68.8                    | -0.66   | MKX      | 148.7                   | 0.62    | 69.7                    | -0.64   |
| CCL2     | 111.2                   | 0.15    | 43.0                    | -1.19   | COMMD3   | 149.6                   | 0.63    | 64.9                    | -0.74   |
| IRF2     | 111.4                   | 0.15    | 145.1                   | 0.93    | BATF2    | 150.7                   | 0.65    | 109.8                   | 0.19    |
| TLK2     | 112.3                   | 0.16    | 92.1                    | -0.17   | DHX58    | 153.6                   | 0.68    | 100.6                   | 0.00    |
| APOL1    | 112.5                   | 0.17    | 70.4                    | -0.63   | GCH1     | 154.0                   | 0.69    | 57.1                    | -0.90   |
| GAK      | 112.8                   | 0.17    | 121.8                   | 0.44    | CDKN1A   | 154.2                   | 0.69    | 153.5                   | 1.10    |
| PCTK2    | 113.3                   | 0.18    | 95.6                    | -0.10   | ENPP1    | 154.9                   | 0.70    | 106.5                   | 0.12    |
| ZNF107   | 113.5                   | 0.18    | 103.5                   | 0.06    | IL1R     | 155.1                   | 0.70    | 46.7                    | -1.12   |
| MARCK    | 114.2                   | 0.19    | 276.4                   | 3.65    | UBE2L6   | 155.3                   | 0.70    | 86.3                    | -0.29   |
| CEBPD    | 115.1                   | 0.20    | 116.2                   | 0.33    | PFKFB3   | 155.7                   | 0.71    | 275.7                   | 3.64    |
| TYMP     | 115.7                   | 0.21    | 96.6                    | -0.08   | RBCK1    | 158.7                   | 0.75    | 140.3                   | 0.83    |
| CES1     | 115.9                   | 0.21    | 130.3                   | 0.62    | HSH2D    | 158.8                   | 0.75    | 178.5                   | 1.62    |
| KIAA1618 | 116.4                   | 0.22    | 134.5                   | 0.70    | RIPK2    | 159.8                   | 0.76    | 79.2                    | -0.44   |
| TREX1    | 116.4                   | 0.22    | 99.7                    | -0.02   | NAPA     | 160.1                   | 0.76    | 75.3                    | -0.53   |
| G6PC     | 116.9                   | 0.22    | 133.4                   | 0.68    | CFB      | 161.7                   | 0.78    | 107.0                   | 0.13    |
| IMPA2    | 117.4                   | 0.23    | 97.7                    | -0.06   | CLEC4A   | 162.0                   | 0.79    | 109.9                   | 0.19    |
| DDX60    | 117.5                   | 0.23    | 78.6                    | -0.46   | IFIT5    | 162.7                   | 0.80    | 106.0                   | 0.11    |
| C22orf28 | 119.4                   | 0.25    | 98.5                    | -0.04   | FNDC3B   | 163.2                   | 0.80    | 103.6                   | 0.06    |
| ABCA9    | 120.2                   | 0.26    | 154.0                   | 1.11    | KIAA0082 | 164.0                   | 0.81    | 64.6                    | -0.75   |
| MT1H     | 120.9                   | 0.27    | 153.7                   | 1.10    | CD38     | 167.2                   | 0.85    | 77.4                    | -0.48   |
| SPSB1    | 121.0                   | 0.27    | 120.4                   | 0.41    | HK2      | 167.7                   | 0.86    | 149.8                   | 1.02    |
| SCARB2   | 121.0                   | 0.27    | 57.4                    | -0.90   | ETV6     | 168.2                   | 0.87    | 97.4                    | -0.07   |
| PPM1K    | 122.1                   | 0.29    | 63.1                    | -0.78   | LY6E     | 168.4                   | 0.87    | 66.6                    | -0.71   |
| MAP3K5   | 122.7                   | 0.29    | 5.3                     | -1.98   | TFEC     | 170.4                   | 0.89    | 98.1                    | -0.05   |
| CRP      | 124.0                   | 0.31    | 98.4                    | -0.04   | SLFN5    | 170.5                   | 0.89    | 64.6                    | -0.75   |
| IRF2     | 124.9                   | 0.32    | 59.8                    | -0.85   | LAP3     | 172.5                   | 0.92    | 110.1                   | 0.20    |
| RGL-1    | 125.8                   | 0.33    | 153.1                   | 1.09    | NRN1     | 172.7                   | 0.92    | 91.3                    | -0.19   |
| GMPR     | 126.4                   | 0.34    | 93.6                    | -0.14   | ZNF107   | 174.4                   | 0.94    | 86.4                    | -0.29   |
| CCL4     | 127.4                   | 0.35    | 72.7                    | -0.58   | PDK1     | 174.5                   | 0.94    | 94.9                    | -0.12   |

Large Scale ISG Screen: EboV trVLP in HEK293 cells – p1 and p2 values (Page 4 of 4)

| Gene      | P2                         |            | P1                         |            | Gene     | P2                         |            | P1                         |            |
|-----------|----------------------------|------------|----------------------------|------------|----------|----------------------------|------------|----------------------------|------------|
|           | Replication<br>(% control) | Z<br>score | Replication<br>(% control) | Z<br>score |          | Replication<br>(% control) | Z<br>score | Replication<br>(% control) | Z<br>score |
| LGALS9    | 175.7                      | 0.96       | 166.6                      | 1.37       | LRG1     | 246.4                      | 1.85       | 132.9                      | 0.67       |
| IL6ST     | 176.3                      | 0.97       | 106.9                      | 0.13       | TLR7     | 248.7                      | 1.88       | 63.9                       | -0.76      |
| RASGEF1B  | 179.1                      | 1.00       | 72.8                       | -0.58      | ADAR     | 250.4                      | 1.90       | 180.5                      | 1.66       |
| RASSF4    | 183.0                      | 1.05       | 118.3                      | 0.37       | TNFSF10  | 255.5                      | 1.96       | 99.2                       | -0.03      |
| DTX3L     | 188.2                      | 1.12       | 110.6                      | 0.21       | CD80     | 262.4                      | 2.05       | 63.1                       | -0.78      |
| CCR1      | 189.7                      | 1.13       | 70.7                       | -0.62      | ARG2     | 269.5                      | 2.14       | 132.9                      | 0.67       |
| CREB3L3   | 192.2                      | 1.17       | 152.9                      | 1.09       | TRIM34   | 271.6                      | 2.16       | 103.1                      | 0.05       |
| LOC400759 | 193.2                      | 1.18       | 85.1                       | -0.32      | HPSE     | 273.0                      | 2.18       | 109.3                      | 0.18       |
| IL15      | 193.6                      | 1.18       | 55.3                       | -0.94      | ZC3HAV1  | 273.6                      | 2.19       | 70.7                       | -0.62      |
| NUP50     | 196.4                      | 1.22       | 87.3                       | -0.27      | PML      | 277.0                      | 2.23       | 267.3                      | 3.46       |
| IGFBP2    | 197.3                      | 1.23       | 141.9                      | 0.86       | PI4K2B   | 278.1                      | 2.24       | 99.9                       | -0.01      |
| GJA4      | 198.1                      | 1.24       | 104.7                      | 0.09       | MASTL    | 280.4                      | 2.27       | 161.7                      | 1.27       |
| HLA-G     | 198.5                      | 1.25       | 82.1                       | -0.38      | FLJ23556 | 291.6                      | 2.41       | 99.0                       | -0.03      |
| FUT4      | 199.1                      | 1.25       | 234.5                      | 2.78       | PAK3     | 295.7                      | 2.46       | 59.2                       | -0.86      |
| PNRC1     | 200.1                      | 1.27       | 80.6                       | -0.41      | TNFSF13B | 306.0                      | 2.59       | 90.3                       | -0.21      |
| LAMP3     | 206.0                      | 1.34       | 143.4                      | 0.89       | ULK4     | 312.9                      | 2.68       | 90.2                       | -0.21      |
| EHD4      | 206.6                      | 1.35       | 77.7                       | -0.47      | MSR1     | 317.5                      | 2.74       | 124.4                      | 0.50       |
| SIGLEC1   | 206.9                      | 1.35       | 177.7                      | 1.60       | TNFAIP6  | 323.0                      | 2.81       | 127.8                      | 0.57       |
| C6orf150  | 213.1                      | 1.43       | 142.6                      | 0.87       | MAX      | 331.3                      | 2.91       | 146.1                      | 0.95       |
| FAM134B   | 217.7                      | 1.49       | 94.5                       | -0.12      | KIAA0040 | 345.5                      | 3.09       | 121.8                      | 0.44       |
| PLSCR1    | 221.2                      | 1.53       | 63.1                       | -0.78      | OAS3     | 371.0                      | 3.41       | 148.0                      | 0.99       |
| GBP4      | 223.4                      | 1.56       | 92.3                       | -0.17      | IFIT2    | 406.4                      | 3.85       | 103.0                      | 0.05       |
| ADM       | 223.6                      | 1.56       | 124.9                      | 0.51       | AHNAK2   | 408.6                      | 3.88       | 125.6                      | 0.52       |
| VEGFC     | 224.7                      | 1.57       | 134.0                      | 0.69       | TRIM5    | 410.9                      | 3.91       | 80.4                       | -0.42      |
| ETV7      | 225.2                      | 1.58       | 80.0                       | -0.43      | OAS2     | 433.0                      | 4.19       | 104.0                      | 0.07       |
| AMPH      | 228.5                      | 1.62       | 190.9                      | 1.88       | CD9      | 491.6                      | 4.92       | 188.2                      | 1.82       |
| IL15RA    | 229.8                      | 1.64       | 135.0                      | 0.72       |          |                            |            |                            |            |
